# Supplementary material for: NanoE-Tox: New and in-depth database concerning ecotoxicity of nanomaterials
Source: publisher site journal article supplement (doi:10.3762/bjnano.6.183), 2015-08-25
Supplement: Additional file 1 [file 2190-4286-6-183-S1.pdf]

## Supporting Information

for

# **NanoE-Tox: New and in-depth database concerning ecotoxicity of nanomaterials**

Katre Juganson<sup>1,2\*</sup>, Angela Ivask<sup>1,3</sup>, Irina Blinova<sup>1</sup>, Monika Mortimer<sup>1,4</sup>, and Anne Kahru<sup>1</sup>

Address: <sup>1</sup>Laboratory of Environmental Toxicology, National Institute of Chemical Physics and Biophysics, Akadeemia tee 23, 12618 Tallinn, Estonia; <sup>2</sup>Department of Chemistry, Tallinn University of Technology, Akadeemia tee 15, 12618 Tallinn, Estonia; <sup>3</sup>Mawson Institute, University of South Australia, Mawson Lakes, 5095 South Australia, Australia and <sup>4</sup>Bren School of Environmental Science & Management, University of California Santa Barbara, Santa Barbara, California 93106-5131, United States

Email: Katre Juganson\* - [katre.juganson@kbfi.ee](mailto:katre.juganson@kbfi.ee)

\* Corresponding autor:

**Supplementary tables**

**Table S1:** Total number of publications in Thomson Reuters Web of Science™ for different applications of eight selected nanomaterials. Search was performed combining the keywords listed in the table with light grey background. The search was done on March 19<sup>th</sup>, 2015.

| nano* AND                      | Ag NPs       | CeO <sub>2</sub> NPs                                | CNTs                                | CuO NPs                | FeO <sub>x</sub> NPs                                                                  | Fullerenes  | TiO <sub>2</sub> NPs                                    | ZnO NPs              | Total        |
|--------------------------------|--------------|-----------------------------------------------------|-------------------------------------|------------------------|---------------------------------------------------------------------------------------|-------------|---------------------------------------------------------|----------------------|--------------|
| Fields of application          | silver OR Ag | cerium<br>*oxide OR<br>ceria OR<br>CeO <sub>2</sub> | carbon<br>nanotu* OR<br>CNT OR *CNT | copper oxide<br>OR CuO | iron *oxide<br>OR Fe <sub>3</sub> O <sub>4</sub> OR<br>Fe <sub>2</sub> O <sub>3</sub> | fulleren*   | titanium<br>*oxide OR<br>titania OR<br>TiO <sub>2</sub> | zinc oxide OR<br>ZnO |              |
| Hydrogen storage               | 189          | 124                                                 | 3642                                | 64                     | 195                                                                                   | 357         | 314                                                     | 110                  | <b>1040</b>  |
| Environmental remediation      | 110          | 16                                                  | 155                                 | 36                     | 219                                                                                   | 23          | 303                                                     | 74                   | <b>655</b>   |
| Catalysis                      | 2043         | 624                                                 | 2553                                | 458                    | 1225                                                                                  | 169         | 2652                                                    | 711                  | <b>5215</b>  |
| Drug delivery                  | 999          | 55                                                  | 2966                                | 60                     | 3687                                                                                  | 272         | 515                                                     | 284                  | <b>4818</b>  |
| Medical imaging                | 97           | 7                                                   | 151                                 | 4                      | 292                                                                                   | 19          | 32                                                      | 21                   | <b>368</b>   |
| Photovoltaics                  | 299          | 3                                                   | 368                                 | 41                     | 14                                                                                    | 355         | 632                                                     | 401                  | <b>1443</b>  |
| Textiles                       | 568          | 11                                                  | 482                                 | 44                     | 77                                                                                    | 14          | 650                                                     | 305                  | <b>1090</b>  |
| Therapeutics                   | 109          | 16                                                  | 324                                 | 8                      | 322                                                                                   | 35          | 32                                                      | 17                   | <b>414</b>   |
| Reinforced composites          | 172          | 37                                                  | 4161                                | 53                     | 83                                                                                    | 91          | 260                                                     | 102                  | <b>589</b>   |
| Electronics                    | 1080         | 16                                                  | 3331                                | 113                    | 116                                                                                   | 286         | 278                                                     | 542                  | <b>1335</b>  |
| Optics                         | 987          | 20                                                  | 638                                 | 35                     | 120                                                                                   | 89          | 249                                                     | 256                  | <b>749</b>   |
| Coatings and pigments          | 19           | 12                                                  | 10                                  | 8                      | 36                                                                                    | 1           | 143                                                     | 53                   | <b>241</b>   |
| Cosmetics                      | 133          | 24                                                  | 95                                  | 8                      | 36                                                                                    | 28          | 265                                                     | 148                  | <b>485</b>   |
| Ceramics applications          | 186          | 140                                                 | 413                                 | 53                     | 132                                                                                   | 17          | 578                                                     | 202                  | <b>982</b>   |
| Anti-oxidants                  | 10           | 13                                                  | 14                                  | 4                      | 4                                                                                     | 7           | 3                                                       | 5                    | <b>23</b>    |
| Lubrication                    | 78           | 10                                                  | 181                                 | 26                     | 37                                                                                    | 115         | 55                                                      | 35                   | <b>268</b>   |
| Sensors                        | 5327         | 288                                                 | 13004                               | 977                    | 1421                                                                                  | 255         | 2596                                                    | 4159                 | <b>9408</b>  |
| Absorbents                     | 37           | 9                                                   | 158                                 | 10                     | 77                                                                                    | 4           | 45                                                      | 35                   | <b>171</b>   |
| Energetics                     | 136          | 18                                                  | 801                                 | 11                     | 38                                                                                    | 267         | 218                                                     | 54                   | <b>588</b>   |
| Magnetics                      | 84           | 3                                                   | 154                                 | 29                     | 1156                                                                                  | 13          | 51                                                      | 53                   | <b>1302</b>  |
| Water purification             | 304          | 33                                                  | 905                                 | 56                     | 468                                                                                   | 60          | 782                                                     | 142                  | <b>1508</b>  |
| Air emissions reduction        | 18           | 9                                                   | 23                                  | 7                      | 9                                                                                     | 3           | 19                                                      | 23                   | <b>61</b>    |
| Natural and green products     | 36           | 1                                                   | 11                                  | 2                      | 10                                                                                    | 0           | 6                                                       | 6                    | <b>24</b>    |
| Quantum computing              | 31           | 5                                                   | 282                                 | 1                      | 52                                                                                    | 49          | 26                                                      | 20                   | <b>148</b>   |
| Masonry and building materials | 1            | 0                                                   | 0                                   | 0                      | 0                                                                                     | 0           | 1                                                       | 0                    | <b>1</b>     |
| Photonics                      | 297          | 2                                                   | 322                                 | 17                     | 31                                                                                    | 31          | 87                                                      | 152                  | <b>318</b>   |
| Surfactants                    | 689          | 97                                                  | 1166                                | 135                    | 468                                                                                   | 80          | 506                                                     | 335                  | <b>1524</b>  |
| Antimicrobials                 | 2931         | 13                                                  | 299                                 | 120                    | 154                                                                                   | 52          | 504                                                     | 341                  | <b>1171</b>  |
| <b>Total</b>                   | <b>16970</b> | <b>1606</b>                                         | <b>36609</b>                        | <b>2380</b>            | <b>10479</b>                                                                          | <b>2692</b> | <b>11802</b>                                            | <b>8586</b>          | <b>35939</b> |

**Table S2:** Mechanisms of toxic action of selected ENMs in different organisms based on information in NanoE-Tox database.

|                                                                  | <b>Ag</b>                                                                                                                | <b>CeO<sub>2</sub></b>            | <b>CNTs</b>                                     | <b>CuO</b>                                               | <b>Fullerenes</b> | <b>TiO<sub>2</sub></b>                                               | <b>ZnO</b>                                                   |
|------------------------------------------------------------------|--------------------------------------------------------------------------------------------------------------------------|-----------------------------------|-------------------------------------------------|----------------------------------------------------------|-------------------|----------------------------------------------------------------------|--------------------------------------------------------------|
| Released ions                                                    | bacteria [1-5]<br>bivalves [6]<br>crustaceans [7-9]<br>earthworms [10]<br>plants [11-13]<br>protists [14]<br>yeasts [15] |                                   |                                                 | bacteria [5,16-19]<br>crustaceans [8,20]<br>insects [21] |                   |                                                                      | bacteria [16-18,22]<br>crustaceans [23]<br>echinoderms [24]  |
| Effect of NPs/ their primary size                                | bacteria [25]<br>crustaceans [26,27]                                                                                     |                                   |                                                 | algae [28]<br>plants [29]                                |                   | algae [30]<br>crustaceans [30,31]<br>nematodes [32]<br>rotifers [30] | plants [33]                                                  |
| Ions + NPs                                                       | algae [34]<br>crustaceans [35]<br>fish [36,37]<br>nematodes [38]                                                         |                                   |                                                 | protists [39]<br>snails [40]                             |                   |                                                                      | bacteria [5]<br>crustaceans [41]<br>fish [42]                |
| Destabilization of cell membranes/<br>mechanical membrane damage | bacteria [43,44]<br>earthworms [45]<br>yeasts [15]                                                                       | algae [46,47]                     | algae [48]<br>bacteria [49]<br>crustaceans [50] | protists [39]                                            |                   | bacteria [51]<br>fish [52]                                           | algae [53]<br>fish [42]                                      |
| Oxidative stress                                                 | bacteria [5,43,54]<br>insects [55]<br>bivalves [6]<br>plants [12]<br>yeasts [15]                                         | nematodes [56]                    | algae [48,57]<br>crustaceans [50]               |                                                          | crustaceans [58]  | bacteria [43,51]<br>fish [52,59]<br>nematodes [32]                   | bacteria [60]<br>earthworms [61]<br>fish [62]<br>snails [63] |
| DNA damage/<br>genotoxic                                         | crustaceans [64]<br>insects [65]<br>plants [66]                                                                          |                                   |                                                 |                                                          |                   |                                                                      | bacteria [60]<br>earthworms [61]                             |
| Disturbing ATP production                                        |                                                                                                                          |                                   | algae [57]                                      |                                                          |                   |                                                                      |                                                              |
| Shading effect                                                   |                                                                                                                          | algae [46]                        | algae [48,67]                                   |                                                          |                   |                                                                      |                                                              |
| Effect of accumulation on the organisms                          | fish [36]                                                                                                                | algae [46]<br>crustaceans [68,69] | algae [67]                                      |                                                          |                   | crustaceans [70]                                                     | fish [42]                                                    |
| Binding to -SH groups                                            | fish [71]                                                                                                                |                                   |                                                 |                                                          |                   |                                                                      |                                                              |

\*There was no information about mechanisms of toxic action of FeO<sub>x</sub> in the NanoE-Tox database

**Table S3:** Accumulation and uptake of selected ENMs in different organisms based on information in NanoE-Tox database.

|                                     | Ag                                                                                                    | CeO <sub>2</sub>                     | CNTs                                                                                        | CuO                                                                                  | FeO <sub>x</sub>                    | Fullerenes                             | TiO <sub>2</sub>                                                                                                                                                                                                                                 | ZnO                                                                                                         |
|-------------------------------------|-------------------------------------------------------------------------------------------------------|--------------------------------------|---------------------------------------------------------------------------------------------|--------------------------------------------------------------------------------------|-------------------------------------|----------------------------------------|--------------------------------------------------------------------------------------------------------------------------------------------------------------------------------------------------------------------------------------------------|-------------------------------------------------------------------------------------------------------------|
| Accumulated in organisms            | bacterial biofilm [72]<br>bivalves [6]<br>crustaceans [73]<br>earthworms [10]<br>plants [11-13,66,74] |                                      | amphibians [75]<br>bivalves [76]<br>crustaceans [77,78]                                     | bivalves [79]<br>crustaceans [20]<br>insects [21]<br>snails [40]<br>plant roots [29] | crustaceans [80]<br>fish [81]       | blackworms [82]<br>crustaceans [83,84] | corals [85]<br>crustaceans [86]<br>fish [87-90]<br>nematodes [32]<br>plants [91,92]                                                                                                                                                              | earthworms [61]<br>fish [42]                                                                                |
| Accumulated on surface of organisms | crustaceans [93]<br>fish eggs [37]                                                                    | crustaceans [69]<br>plant roots [94] | algae [67]<br>bivalves [95]<br>crustaceans [95-97]<br>plant roots [98]                      | insects [21]                                                                         |                                     |                                        | bacteria [99]<br>crustaceans [70]<br>plants [100]                                                                                                                                                                                                | algae [101]<br>plant roots [102]                                                                            |
| Ingested by organisms               | crustaceans [26]<br>protists [14]                                                                     | nematodes [56]                       | amphibians [103]<br>bivalves [76,95]<br>crustaceans [77,84,95,96,104,105]<br>protists [106] | crustaceans [20]                                                                     | crustaceans [80]                    | crustaceans [84]                       | crustaceans [84,107,108]<br>lugworms [109]<br>nematodes [32]                                                                                                                                                                                     | crustaceans [84]                                                                                            |
| Translocation seed → plant (yes/no) |                                                                                                       |                                      | no [98]                                                                                     |                                                                                      |                                     |                                        |                                                                                                                                                                                                                                                  |                                                                                                             |
| Translocation root → shoot (yes/no) |                                                                                                       | no/very low [94]                     |                                                                                             | limited [29]                                                                         |                                     | yes [98]                               | yes if size is less than 36 nm [92]                                                                                                                                                                                                              | very low [102]                                                                                              |
| Other observations                  |                                                                                                       |                                      |                                                                                             |                                                                                      | BCF in fish larvae 0.04...0.14 [81] |                                        | Significant uptake in <i>E. coli</i> ; [60]<br>Dose-dependent increase in internalization in bacteria; [110]<br>BCF in coral tissue 2...62, in posterior mixture 238...594; [85]<br>BCF in crustaceans under illumination 502, in dark 318 [111] | Significant uptake in <i>E. coli</i> ; [60]<br>Dose-dependent increase in internalization in bacteria [110] |

**Table S4:** List of journals in NanoE-Tox.

|    | <b>Journal title</b>                                               | <b>No. of papers</b> | <b>No. of entries</b> | <b>5-year impact factor</b> |
|----|--------------------------------------------------------------------|----------------------|-----------------------|-----------------------------|
| 1  | ENVIRONMENTAL TOXICOLOGY AND CHEMISTRY                             | 29                   | 156                   | 3.282                       |
| 2  | ENVIRONMENTAL SCIENCE & TECHNOLOGY                                 | 25                   | 170                   | 6.277                       |
| 3  | CHEMOSPHERE                                                        | 18                   | 129                   | 3.897                       |
| 4  | ENVIRONMENTAL POLLUTION                                            | 12                   | 107                   | 4.306                       |
| 5  | AQUATIC TOXICOLOGY                                                 | 12                   | 31                    | 3.948                       |
| 6  | SCIENCE OF THE TOTAL ENVIRONMENT                                   | 11                   | 85                    | 3.906                       |
| 7  | JOURNAL OF HAZARDOUS MATERIALS                                     | 10                   | 79                    | 5.123                       |
| 8  | PloS one                                                           | 7                    | 34                    | 4.015                       |
| 9  | ECOTOXICOLOGY AND ENVIRONMENTAL SAFETY                             | 6                    | 73                    | 2.715                       |
| 10 | NANOTOXICOLOGY                                                     | 5                    | 23                    | 7.766                       |
| 11 | ENVIRONMENTAL SCIENCE AND POLLUTION RESEARCH                       | 5                    | 62                    | 2.951                       |
| 12 | ECOTOXICOLOGY                                                      | 4                    | 16                    | 3.191                       |
| 13 | JOURNAL OF NANOPARTICLE RESEARCH                                   | 4                    | 31                    | 2.927                       |
| 14 | ENVIRONMENTAL TOXICOLOGY                                           | 4                    | 50                    | 2.371                       |
| 15 | JOURNAL OF ENVIRONMENTAL MONITORING                                | 4                    | 10                    | 2.133                       |
| 16 | ENVIRONMENTAL TOXICOLOGY AND PHARMACOLOGY                          | 4                    | 28                    | 2.093                       |
| 17 | ACS Nano                                                           | 3                    | 26                    | 13.774                      |
| 18 | NANOMEDICINE                                                       | 3                    | 26                    | 5.966                       |
| 19 | TOXICOLOGICAL SCIENCES                                             | 3                    | 38                    | 4.855                       |
| 20 | JOURNAL OF NANOBIO TECHNOLOGY                                      | 3                    | 19                    | #N/A                        |
| 21 | ANALYTICAL AND BIOANALYTICAL CHEMISTRY                             | 2                    | 65                    | 3.744                       |
| 22 | DESALINATION                                                       | 2                    | 29                    | 3.481                       |
| 23 | MARINE ENVIRONMENTAL RESEARCH                                      | 2                    | 10                    | 2.525                       |
| 24 | JOURNAL OF ENVIRONMENTAL SCIENCES-CHINA                            | 2                    | 3                     | 2.465                       |
| 25 | ARCHIVES OF ENVIRONMENTAL CONTAMINATION AND TOXICOLOGY             | 2                    | 6                     | 2.135                       |
| 26 | TOXICOLOGICAL AND ENVIRONMENTAL CHEMISTRY                          | 2                    | 24                    | #N/A                        |
| 27 | NATURE NANOTECHNOLOGY                                              | 1                    | 5                     | 38.586                      |
| 28 | SMALL                                                              | 1                    | 4                     | 8.416                       |
| 29 | CARBON                                                             | 1                    | 7                     | 6.638                       |
| 30 | WATER RESEARCH                                                     | 1                    | 6                     | 6.092                       |
| 31 | FREE RADICAL BIOLOGY AND MEDICINE                                  | 1                    | 2                     | 5.983                       |
| 32 | SOIL BIOLOGY & BIOCHEMISTRY                                        | 1                    | 1                     | 4.785                       |
| 33 | LANGMUIR                                                           | 1                    | 6                     | 4.489                       |
| 34 | COLLOIDS AND SURFACES B-BIOINTERFACES                              | 1                    | 14                    | 4.226                       |
| 35 | APPLIED MICROBIOLOGY AND BIOTECHNOLOGY                             | 1                    | 12                    | 4.138                       |
| 36 | ENVIRONMENTAL RESEARCH                                             | 1                    | 4                     | 4.033                       |
| 37 | TOXICOLOGY                                                         | 1                    | 9                     | 3.884                       |
| 38 | TOXICOLOGY LETTERS                                                 | 1                    | 4                     | 3.706                       |
| 39 | ENVIRONMENTAL MICROBIOLOGY REPORTS                                 | 1                    | 3                     | 3.556                       |
| 40 | ECOLOGICAL ENGINEERING                                             | 1                    | 2                     | 3.479                       |
| 41 | CYTOMETRY PART A                                                   | 1                    | 2                     | 3.306                       |
| 42 | FOOD AND CHEMICAL TOXICOLOGY                                       | 1                    | 1                     | 3.21                        |
| 43 | PROCESS BIOCHEMISTRY                                               | 1                    | 2                     | 2.922                       |
| 44 | MUTATION RESEARCH-GENETIC TOXICOLOGY AND ENVIRONMENTAL MUTAGENESIS | 1                    | 4                     | 2.716                       |
| 45 | COLLOIDS AND SURFACES A-PHYSCOCHEMICAL AND ENGINEERING ASPECTS     | 1                    | 10                    | 2.494                       |
| 46 | HYDROBIOLOGIA                                                      | 1                    | 3                     | 2.35                        |

|    | <b>Journal title</b>                                                                                      | <b>No. of papers</b> | <b>No. of entries</b> | <b>5-year impact factor</b> |
|----|-----------------------------------------------------------------------------------------------------------|----------------------|-----------------------|-----------------------------|
| 47 | PARASITOLOGY RESEARCH                                                                                     | 1                    | 2                     | 2.286                       |
| 48 | APPLIED BIOCHEMISTRY AND BIOTECHNOLOGY                                                                    | 1                    | 1                     | 1.994                       |
| 49 | WATER AIR AND SOIL POLLUTION                                                                              | 1                    | 1                     | 1.943                       |
| 50 | ANALYTICAL METHODS                                                                                        | 1                    | 1                     | 1.913                       |
| 51 | JOURNAL OF TOXICOLOGY AND ENVIRONMENTAL HEALTH-PART A-CURRENT ISSUES                                      | 1                    | 2                     | 1.868                       |
| 52 | BIOLOGICAL TRACE ELEMENT RESEARCH                                                                         | 1                    | 1                     | 1.656                       |
| 53 | JOURNAL OF MICROBIOLOGY AND BIOTECHNOLOGY                                                                 | 1                    | 2                     | 1.484                       |
| 54 | SCIENTIFIC WORLD JOURNAL                                                                                  | 1                    | 12                    | 1.3                         |
| 55 | JOURNAL OF ENVIRONMENTAL SCIENCE AND HEALTH PART A-TOXIC/HAZARDOUS SUBSTANCES & ENVIRONMENTAL ENGINEERING | 1                    | 4                     | 1.233                       |
| 56 | BULLETIN OF THE KOREAN CHEMICAL SOCIETY                                                                   | 1                    | 2                     | 0.797                       |
| 57 | ASIAN PACIFIC JOURNAL OF TROPICAL MEDICINE                                                                | 1                    | 4                     | 0.665                       |
| 58 | ARCHIVES OF BIOLOGICAL SCIENCES                                                                           | 1                    | 4                     | 0.606                       |
| 59 | INLAND WATER BIOLOGY                                                                                      | 1                    | 17                    | 0.321                       |
| 60 | ENVIRONMENTAL ENGINEERING RESEARCH                                                                        | 1                    | 3                     | #N/A                        |
| 61 | JOURNAL OF ENVIRONMENTAL HEALTH SCIENCES                                                                  | 1                    | 16                    | #N/A                        |
| 62 | ACS SUSTAINABLE CHEMISTRY & ENGINEERING                                                                   | 1                    | 3                     | #N/A                        |
| 63 | ENVIRONMENTAL HEALTH AND TOXICOLOGY                                                                       | 1                    | 3                     | #N/A                        |
| 64 | ENVIRONMENTAL SCIENCE-PROCESSES & IMPACTS                                                                 | 1                    | 2                     | #N/A                        |
| 65 | NANOCON 2009, CONFERENCE PROCEEDINGS                                                                      | 1                    | 6                     | #N/A                        |
| 66 | NANOSAFE 2012: INTERNATIONAL CONFERENCES ON SAFE PRODUCTION AND USE OF NANOMATERIALS                      | 1                    | 1                     | #N/A                        |
|    | <b>TOTAL</b>                                                                                              | 224                  | 1518                  |                             |

**Table S5:** Organism-wise distribution of data in NanoE-Tox. Number in parenthesis indicates number of entries in the database.

|             | CNT                                                                                                                                                                                                        | Fullerenes                                                                                                                                    | ZnO                                                                                                                                                                                                            | CeO2                                                                                                                                                                                      | Ag                                                                                                                                                                                                                                                                                                                                                                                                                                                                                | TiO2                                                                                                                                                                                                                                               | CuO                                                                                                                                                                                                                                                                                                                                 | FeOx                                                                                                                                                      |
|-------------|------------------------------------------------------------------------------------------------------------------------------------------------------------------------------------------------------------|-----------------------------------------------------------------------------------------------------------------------------------------------|----------------------------------------------------------------------------------------------------------------------------------------------------------------------------------------------------------------|-------------------------------------------------------------------------------------------------------------------------------------------------------------------------------------------|-----------------------------------------------------------------------------------------------------------------------------------------------------------------------------------------------------------------------------------------------------------------------------------------------------------------------------------------------------------------------------------------------------------------------------------------------------------------------------------|----------------------------------------------------------------------------------------------------------------------------------------------------------------------------------------------------------------------------------------------------|-------------------------------------------------------------------------------------------------------------------------------------------------------------------------------------------------------------------------------------------------------------------------------------------------------------------------------------|-----------------------------------------------------------------------------------------------------------------------------------------------------------|
| Algae       | Green algae                                                                                                                                                                                                | <i>Chlorella sp.</i> (3)<br><i>Chlorella vulgaris</i> (18)<br><i>Dunaliella tertiolecta</i> (2)<br><i>Pseudokirchneriella subcapitata</i> (7) |                                                                                                                                                                                                                | <i>Pseudokirchneriella subcapitata</i> (5)                                                                                                                                                | <i>Chlamydomonas reinhardtii</i> (4)<br><i>Pseudokirchneriella subcapitata</i> (68)                                                                                                                                                                                                                                                                                                                                                                                               | <i>Chlorella vulgaris</i> (2)<br><i>Dunaliella tertiolecta</i> (2)<br><i>Pseudokirchneriella subcapitata</i> (4)                                                                                                                                   | <i>Chlamydomonas moewusii</i> (1)<br><i>Chlamydomonas reinhardtii</i> (1)<br><i>Chlorella sp.</i> (2)<br><i>Chlorella vulgaris</i> (2)<br><i>Desmodesmus subspicatus</i> (4)<br><i>Phaeodactylum tricomutum</i> (3)<br><i>Pseudokirchneriella subcapitata</i> (23)<br><i>Scenedesmus sp.</i> (2)<br><i>Scenedesmus obliquus</i> (2) | <i>Chlorella spp.</i> (2)<br><i>Nitellopsis obtusa</i> (2)                                                                                                |
|             | Red algae                                                                                                                                                                                                  | <i>Thalassiosira pseudonana</i> (4)                                                                                                           |                                                                                                                                                                                                                | <i>Thalassiosira weissflogii</i> (3)                                                                                                                                                      | <i>Nitzschia palea</i> (2)                                                                                                                                                                                                                                                                                                                                                                                                                                                        | <i>Ceramium tenuicome</i> (12)                                                                                                                                                                                                                     | <i>Scenedesmus quadricauda</i> (1)                                                                                                                                                                                                                                                                                                  |                                                                                                                                                           |
| Amphibians  | <i>Ambystoma mexicanum</i> (1)<br><i>Xenopus laevis</i> (13)                                                                                                                                               |                                                                                                                                               |                                                                                                                                                                                                                | <i>Pleurodeles waltl</i> (2)<br><i>Xenopus laevis</i> (3)                                                                                                                                 |                                                                                                                                                                                                                                                                                                                                                                                                                                                                                   |                                                                                                                                                                                                                                                    |                                                                                                                                                                                                                                                                                                                                     |                                                                                                                                                           |
| Bacteria    | <i>Bacillus subtilis</i> (2)<br><i>Cupriavidus metallidurans</i> (1)<br><i>Escherichia coli</i> (4)<br><i>Pseudomonas aeruginosa</i> (2)<br><i>Staphylococcus aureus</i> (2)<br><i>Vibrio fischeri</i> (1) | <i>Bacillus stearothermophilus</i> (1)<br><i>Escherichia coli</i> (12)<br><i>Vibrio fischeri</i> (2)                                          | <i>Anabaena flos-aquae</i> (3)<br><i>Escherichia coli</i> (24)<br><i>Pseudomonas putida</i> (7)<br><i>Vibrio fischeri</i> (6)                                                                                  | <i>Anabaena</i> (24)<br><i>Escherichia coli</i> (1)<br><i>Vibrio fischeri</i> (3)                                                                                                         | <i>Arthrobacter globiformis</i> (2)<br><i>Bacillus aquimaris</i> (12)<br><i>Bacillus thuringiensis</i> (12)<br><i>Enterococcus faecalis</i> (1)<br><i>Escherichia coli</i> (27)<br><i>Klebsiella pneumoniae</i> (1)<br><i>Nitrosomonas europaea</i> (2)<br><i>Pseudomonas aeruginosa</i> (2)<br><i>Pseudomonas chlororaphis</i> (10)<br><i>Pseudomonas putida</i> (16)<br><i>Staphylococcus aureus</i> (2)<br><i>Staphylococcus epidermidis</i> (1)<br><i>Vibrio fischeri</i> (4) | <i>Anabaena variabilis</i> (1)<br><i>Cupriavidus metallidurans</i> (6)<br><i>Escherichia coli</i> (37)<br><i>Pseudomonas putida</i> (2)<br><i>Vibrio fischeri</i> (18)                                                                             | <i>Escherichia coli</i> (13)<br><i>Vibrio fischeri</i> (7)                                                                                                                                                                                                                                                                          | <i>Escherichia coli</i> (2)<br><i>Vibrio fischeri</i> (3)                                                                                                 |
| Bivalves    | Clams<br>Mussels                                                                                                                                                                                           |                                                                                                                                               |                                                                                                                                                                                                                |                                                                                                                                                                                           | <i>Macoma balthica</i> (2)<br><i>Elliptio complanata</i> (2)                                                                                                                                                                                                                                                                                                                                                                                                                      |                                                                                                                                                                                                                                                    | <i>Macoma balthica</i> (1)                                                                                                                                                                                                                                                                                                          |                                                                                                                                                           |
| Cnidarians  | Corals                                                                                                                                                                                                     |                                                                                                                                               |                                                                                                                                                                                                                |                                                                                                                                                                                           | <i>Acropora japonica</i> (8)                                                                                                                                                                                                                                                                                                                                                                                                                                                      |                                                                                                                                                                                                                                                    |                                                                                                                                                                                                                                                                                                                                     |                                                                                                                                                           |
|             | Hydra                                                                                                                                                                                                      | <i>Hydra attenuata</i> (1)                                                                                                                    | <i>Hydra attenuata</i> (1)                                                                                                                                                                                     |                                                                                                                                                                                           |                                                                                                                                                                                                                                                                                                                                                                                                                                                                                   | <i>Hydra attenuata</i> (1)                                                                                                                                                                                                                         |                                                                                                                                                                                                                                                                                                                                     |                                                                                                                                                           |
| Crustaceans | Amphipods                                                                                                                                                                                                  | <i>Hyalella azteca</i> (4)<br><i>Leptocheirus plumulosus</i> (1)                                                                              |                                                                                                                                                                                                                |                                                                                                                                                                                           |                                                                                                                                                                                                                                                                                                                                                                                                                                                                                   | <i>Gammarus fossarum</i> (7)                                                                                                                                                                                                                       |                                                                                                                                                                                                                                                                                                                                     |                                                                                                                                                           |
|             | Branchiopods                                                                                                                                                                                               | <i>Ceriodaphnia dubia</i> (11)<br><i>Daphnia magna</i> (15)<br><i>Daphnia similis</i> (2)<br><i>Thamnocephalus platyurus</i> (1)              | <i>Daphnia magna</i> (7)<br><i>Daphnia pulex</i> (4)<br><i>Thamnocephalus platyurus</i> (1)                                                                                                                    | <i>Ceriodaphnia affinis</i> (4)<br><i>Daphnia magna</i> (28)<br><i>Thamnocephalus platyurus</i> (10)                                                                                      | <i>Ceriodaphnia affinis</i> (4)<br><i>Ceriodaphnia dubia</i> (1)<br><i>Chydorus sphaericus</i> (1)<br><i>Daphnia magna</i> (34)<br><i>Daphnia pulex</i> (4)<br><i>Daphnia similis</i> (2)<br><i>Thamnocephalus platyurus</i> (3)                                                                                                                                                                                                                                                  | <i>Artemia nauplii</i> (12)<br><i>Chydorus sphaericus</i> (3)<br><i>Daphnia galeata</i> (3)<br><i>Daphnia magna</i> (141)<br><i>Daphnia pulex</i> (3)<br><i>Thamnocephalus platyurus</i> (8)                                                       | <i>Artemia salina</i> (8)<br><i>Ceriodaphnia affinis</i> (4)<br><i>Ceriodaphnia dubia</i> (3)<br><i>Chydorus sphaericus</i> (1)<br><i>Daphnia magna</i> (78)<br><i>Daphnia similis</i> (17)<br><i>Thamnocephalus platyurus</i> (4)                                                                                                  | <i>Daphnia magna</i> (33)<br><i>Thamnocephalus platyurus</i> (12)                                                                                         |
|             | Copepods                                                                                                                                                                                                   | <i>Amphiascus tenuiremis</i> (2)<br><i>Tigriopus japonicus</i> (6)                                                                            |                                                                                                                                                                                                                | <i>Acartia tonsa</i> (6)                                                                                                                                                                  |                                                                                                                                                                                                                                                                                                                                                                                                                                                                                   | <i>Tisbe battagliai</i> (8)                                                                                                                                                                                                                        |                                                                                                                                                                                                                                                                                                                                     |                                                                                                                                                           |
|             | Ostracods                                                                                                                                                                                                  |                                                                                                                                               |                                                                                                                                                                                                                | <i>Heterocypris incongruens</i> (1)                                                                                                                                                       |                                                                                                                                                                                                                                                                                                                                                                                                                                                                                   |                                                                                                                                                                                                                                                    |                                                                                                                                                                                                                                                                                                                                     |                                                                                                                                                           |
| Fish        | <i>Danio rerio</i> (2)<br><i>Oncorhynchus mykiss</i> (3)<br><i>Oreochromis niloticus</i> (1)<br><i>Oryzias latipes</i> (2)                                                                                 | <i>Danio rerio</i> (5)                                                                                                                        | <i>Cyprinus carpio</i> (1)<br><i>Danio rerio</i> (6)                                                                                                                                                           | <i>Danio rerio</i> (9)                                                                                                                                                                    | <i>Danio rerio</i> (30)<br><i>Oncorhynchus mykiss</i> (4)<br><i>Oryzias latipes</i> (2)<br><i>Pimephales promelas</i> (4)                                                                                                                                                                                                                                                                                                                                                         | <i>Cyprinus carpio</i> (4)<br><i>Danio rerio</i> (10)<br><i>Oncorhynchus mykiss</i> (3)<br><i>Oryzias latipes</i> (6)                                                                                                                              |                                                                                                                                                                                                                                                                                                                                     | <i>Danio rerio</i> (4)<br><i>Oryzias latipes</i> (1)                                                                                                      |
| Insects     | <i>Chironomus dilutus</i> (3)<br><i>Drosophila melanogaster</i> (2)                                                                                                                                        | <i>Drosophila melanogaster</i> (1)                                                                                                            | <i>Folsomia candida</i> (6)                                                                                                                                                                                    | <i>Chironomus riparius</i> (6)                                                                                                                                                            | <i>Aedes aegypti</i> (2)<br><i>Chironomus riparius</i> (7)<br><i>Culex quinquefasciatus</i> (2)<br><i>Drosophila melanogaster</i> (4)<br><i>Folsomia candida</i> (2)                                                                                                                                                                                                                                                                                                              | <i>Chironomus riparius</i> (2)<br><i>Hippobosca maculata</i> (1)                                                                                                                                                                                   | <i>Allogamus ligonifer</i> (2)                                                                                                                                                                                                                                                                                                      |                                                                                                                                                           |
| Nematodes   |                                                                                                                                                                                                            |                                                                                                                                               | <i>Caenorhabditis elegans</i> (1)                                                                                                                                                                              | <i>Caenorhabditis elegans</i> (7)                                                                                                                                                         | <i>Caenorhabditis elegans</i> (18)                                                                                                                                                                                                                                                                                                                                                                                                                                                | <i>Caenorhabditis elegans</i> (15)                                                                                                                                                                                                                 |                                                                                                                                                                                                                                                                                                                                     |                                                                                                                                                           |
| Plants      | <i>Cucurbita pepo</i> (1)<br><i>Oryza sativa</i> (3)                                                                                                                                                       | <i>Lemna gibba</i> (3)<br><i>Oryza sativa</i> (1)                                                                                             | <i>Cucurbita pepo</i> (2)<br><i>Fagopyrum esculentum</i> (2)<br><i>Lactuca sativa</i> (1)<br><i>Lepidium sativum</i> (10)<br><i>Lolium perenne</i> (1)<br><i>Raphanus sativus</i> (1)<br><i>Vicia faba</i> (1) | <i>Cucumis sativus</i> (3)<br><i>Cucurbita maxima</i> (3)<br><i>Lactuca sativa</i> (3)<br><i>Solanum lycopersicum</i> (3)<br><i>Spinacia oleracea</i> (1)<br><i>Triticum aestivum</i> (3) | <i>Allium cepa</i> (2)<br><i>Arabidopsis thaliana</i> (3)<br><i>Cucumis sativus</i> (1)<br><i>Cucurbita pepo</i> (9)<br><i>Hordeum vulgare</i> (10)<br><i>Lactuca sativa</i> (2)<br><i>Lemna gibba</i> (4)<br><i>Linum usitatissimum</i> (6)<br><i>Lolium perenne</i> (7)<br><i>Lycopersicon esculentum</i> (10)<br><i>Nicotiana tabacum</i> (2)<br><i>Zea mays</i> (12)                                                                                                          | <i>Cucumis sativus</i> (1)<br><i>Lactuca sativa</i> (3)<br><i>Lemna minor</i> (3)<br><i>Lepidium sativum</i> (3)<br><i>Raphanus sativus</i> (1)<br><i>Solanum lycopersicum</i> (1)<br><i>Spinacia oleracea</i> (1)<br><i>Triticum aestivum</i> (5) | <i>Lactuca sativa</i> (1)<br><i>Raphanus sativus</i> (1)<br><i>Schoenoplectus tabernaemontani</i> (2)                                                                                                                                                                                                                               | <i>Cucumis sativus</i> (2)<br><i>Lactuca sativa</i> (3)<br><i>Raphanus sativus</i> (1)<br><i>Solanum lycopersicum</i> (1)<br><i>Spinacia oleracea</i> (1) |
| Protists    | <i>Tetrahymena thermophila</i> (5)                                                                                                                                                                         |                                                                                                                                               | <i>Bodo saltans</i> (1)<br><i>Euglena gracilis</i> (3)<br><i>Tetrahymena thermophila</i> (4)                                                                                                                   | <i>Bodo saltans</i> (2)                                                                                                                                                                   | <i>Tetrahymena thermophila</i> (2)                                                                                                                                                                                                                                                                                                                                                                                                                                                | <i>Bodo saltans</i> (2)                                                                                                                                                                                                                            | <i>Tetrahymena thermophila</i> (2)                                                                                                                                                                                                                                                                                                  |                                                                                                                                                           |
| Rotifers    |                                                                                                                                                                                                            |                                                                                                                                               |                                                                                                                                                                                                                |                                                                                                                                                                                           |                                                                                                                                                                                                                                                                                                                                                                                                                                                                                   | <i>Brachionus plicatilis</i> (3)                                                                                                                                                                                                                   | <i>Brachionus calyciflorus</i> (2)                                                                                                                                                                                                                                                                                                  |                                                                                                                                                           |
| Echinoderms |                                                                                                                                                                                                            |                                                                                                                                               | <i>Lytechinus pictus</i> (1)                                                                                                                                                                                   |                                                                                                                                                                                           |                                                                                                                                                                                                                                                                                                                                                                                                                                                                                   | <i>Lytechinus pictus</i> (1)                                                                                                                                                                                                                       |                                                                                                                                                                                                                                                                                                                                     |                                                                                                                                                           |
| Snails      |                                                                                                                                                                                                            |                                                                                                                                               | <i>Biomphalaria alexandrina</i> (3)                                                                                                                                                                            |                                                                                                                                                                                           | <i>Physa acuta</i> (3)<br><i>Potamopyrgus antipodarum</i> (3)                                                                                                                                                                                                                                                                                                                                                                                                                     | <i>Haliotis diversicolor supertexta</i> (4)                                                                                                                                                                                                        | <i>Potamopyrgus antipodarum</i> (2)                                                                                                                                                                                                                                                                                                 |                                                                                                                                                           |
| Worms       | <i>Arenicola marina</i> (1)<br><i>Eisenia veneta</i> (6)<br><i>Lumbriculus variegatus</i> (3)                                                                                                              | <i>Eisenia fetida</i> (4)<br><i>Eisenia veneta</i> (4)<br><i>Lumbricus rubellus</i> (5)<br><i>Lumbriculus variegatus</i> (2)                  | <i>Eisenia fetida</i> (6)                                                                                                                                                                                      |                                                                                                                                                                                           | <i>Eisenia andrei</i> (4)<br><i>Eisenia fetida</i> (4)<br><i>Lumbricus terrestris</i> (13)                                                                                                                                                                                                                                                                                                                                                                                        | <i>Arenicola marina</i> (1)<br><i>Eisenia andrei</i> (7)<br><i>Eisenia fetida</i> (10)                                                                                                                                                             |                                                                                                                                                                                                                                                                                                                                     |                                                                                                                                                           |
| Yeasts      |                                                                                                                                                                                                            |                                                                                                                                               |                                                                                                                                                                                                                |                                                                                                                                                                                           | <i>Saccharomyces cerevisiae</i> (1)                                                                                                                                                                                                                                                                                                                                                                                                                                               | <i>Saccharomyces cerevisiae</i> (1)                                                                                                                                                                                                                |                                                                                                                                                                                                                                                                                                                                     | <i>Saccharomyces cerevisiae</i> (2)                                                                                                                       |

## References

1. Ivask, A.; ElBadawy, A.; Kaweeteerawat, C.; Boren, D.; Fischer, H.; Ji, Z.; Chang, C. H.; Liu, R.; Tolaymat, T.; Telesca, D.; Zink, J. I.; Cohen, Y.; Holden, P. A.; Godwin, H. A. *ACS Nano*. **2014**, *8*, 374-386.
2. Radniecki, T. S.; Stankus, D. P.; Neigh, A.; Nason, J. A.; Semprini, L. *Chemosphere*. **2011**, *85*, 43-49.
3. Calder, A. J.; Dimkpa, C. O.; McLean, J. E.; Britt, D. W.; Johnson, W.; Anderson, A. J. *Sci Total Environ*. **2012**, *429*, 215-222.
4. Engelke, M.; Koester, J.; Hackmann, S.; Zhang, H.; Maedler, L.; Filser, J. *Environ Toxicol Chem*. **2014**, *33*, 1142-1147.
5. Ivask, A.; Bondarenko, O.; Jephthina, N.; Kahru, A. *Anal Bioanal Chem*. **2010**, *398*, 701-716.
6. Gagne, F.; Auclair, J.; Fortier, M.; Bruneau, A.; Fournier, M.; Turcotte, P.; Pilote, M.; Gagnon, C. *J Toxicol Environ Health, A: Curr Iss*. **2013**, *76*, 767-777.
7. Lee, Y.-J.; Kim, J.; Oh, J.; Bae, S.; Lee, S.; Hong, I. S.; Kim, S.-H. *Environ Toxicol Chem*. **2012**, *31*, 155-159.
8. Jo, H. J.; Choi, J. W.; Lee, S. H.; Hong, S. W. *J Hazard Mater*. **2012**, *227*, 301-308.
9. Allen, H. J.; Impellitteri, C. A.; Macke, D. A.; Heckman, J. L.; Poynton, H. C.; Lazorchak, J. M.; Govindaswamy, S.; Roose, D. L.; Nadagouda, M. N. *Environ Toxicol Chem*. **2010**, *29*, 2742-2750.
10. Schlich, K.; Klawonn, T.; Terytze, K.; Hund-Rinke, K. *Environ Toxicol Chem*. **2013**, *32*, 181-188.
11. Kaveh, R.; Li, Y.-S.; Ranjbar, S.; Tehrani, R.; Brueck, C. L.; Van Aken, B. *Environ Sci Technol*. **2013**, *47*, 10637-10644.
12. Oukarroum, A.; Barhoumi, L.; Pirastru, L.; Dewez, D. *Environ Toxicol Chem*. **2013**, *32*, 902-907.
13. Stampoulis, D.; Sinha, S. K.; White, J. C. *Environ Sci Technol*. **2009**, *43*, 9473-9479.
14. Juganson, K.; Mortimer, M.; Ivask, A.; Kasemets, K.; Kahru, A. *Env Sci Process Impact*. **2013**, *15*, 244-250.
15. Niazi, J. H.; Sang, B.-I.; Kim, Y. S.; Gu, M. B. *Appl Biochem Biotechnol*. **2011**, *164*, 1278-1291.
16. Luna-delRisco, M.; Orupold, K.; Dubourguier, H.-C. *J Hazard Mater*. **2011**, *189*, 603-608.
17. Ko, K.-S.; Kong, I. C. *Appl Microbiol Biotechnol*. **2014**, *98*, 3295-3303.
18. Rousk, J.; Ackermann, K.; Curling, S. F.; Jones, D. L. *PLoS One*. **2012**, *7*.
19. Heinlaan, M.; Ivask, A.; Blinova, I.; Dubourguier, H.-C.; Kahru, A. *Chemosphere*. **2008**, *71*, 1308-1316.
20. Blinova, I.; Ivask, A.; Heinlaan, M.; Mortimer, M.; Kahru, A. *Environ Pollut*. **2010**, *158*, 41-47.
21. Pradhan, A.; Seenaa, S.; Pascoal, C.; Cassio, F. *Chemosphere*. **2012**, *89*, 1142-1150.
22. Li, M.; Zhu, L.; Lin, D. *Environ Sci Technol*. **2011**, *45*, 1977-1983.
23. Wiench, K.; Wohlleben, W.; Hisgen, V.; Radke, K.; Salinas, E.; Zok, S.; Landsiedel, R. *Chemosphere*. **2009**, *76*, 1356-1365.
24. Fairbairn, E. A.; Keller, A. A.; Maedler, L.; Zhou, D.; Pokhrel, S.; Cherr, G. N. *J Hazard Mater*. **2011**, *192*, 1565-1571.
25. Kumar, D.; Kumari, J.; Pakrashi, S.; Dalai, S.; Raichur, A. M.; Sastry, T. P.; Mandal, A. B.; Chandrasekaran, N.; Mukherjee, A. *Ecotoxicol Environ Saf*. **2014**, *108*, 152-160.
26. Scanlan, L. D.; Reed, R. B.; Loguinov, A. V.; Antczak, P.; Tagmount, A.; Aloni, S.; Nowinski, D. T.; Luong, P.; Tran, C.; Karunaratne, N.; Don, P.; Lin, X. X.; Falciani, F.; Higgins, C. P.; Ranville, J. F.; Vulpe, C. D.; Gilbert, B. *ACS Nano*. **2013**, *7*, 10681-10694.
27. Harmon, A. R.; Kennedy, A. J.; Poda, A. R.; Bednar, A. J.; Chappell, M. A.; Steevens, J. A. *Environ Toxicol Chem*. **2014**, *33*, 1783-1791.
28. Manusadzianas, L.; Caillet, C.; Fachetti, L.; Gylyte, B.; Grigutyte, R.; Jurkoniene, S.; Karitonas, R.; Sadauskas, K.; Thomas, F.; Vitkus, R.; Ferard, J.-F. *Environ Toxicol Chem*. **2012**, *31*, 108-114.
29. Zhang, D.; Hua, T.; Xiao, F.; Chen, C.; Gersberg, R. M.; Liu, Y.; Ng, W. J.; Tan, S. K. *Ecol Eng*. **2014**, *70*, 114-123.
30. Clement, L.; Hurel, C.; Marmier, N. *Chemosphere*. **2013**, *90*, 1083-1090.



31. Seitz, F.; Rosenfeldt, R. R.; Schneider, S.; Schulz, R.; Bundschuh, M. *Sci Total Environ.* **2014**, *493*, 891-897.
32. Angelstorf, J. S.; Ahlf, W.; von der Kammer, F.; Heise, S. *Environ Toxicol Chem.* **2014**, *33*, 2288-2296.
33. Manzo, S.; Rocco, A.; Carotenuto, R.; Picione, F. D. L.; Miglietta, M. L.; Rametta, G.; Di Francia, G. *Environ Sci Pollut Res.* **2011**, *18*, 756-763.
34. Ribeiro, F.; Gallego-Urrea, J. A.; Jurkschat, K.; Crossley, A.; Hasselov, M.; Taylor, C.; Soares, A. M. V. M.; Loureiro, S. *Sci Total Environ.* **2014**, *466*, 232-241.
35. Macken, A.; Byrne, H. J.; Thomas, K. V. *Ecotoxicol Environ Saf.* **2012**, *86*, 101-110.
36. Osborne, O. J.; Johnston, B. D.; Moger, J.; Balousha, M.; Lead, J. R.; Kudoh, T.; Tyler, C. R. *Nanotoxicology.* **2013**, *7*, 1315-1324.
37. Laban, G.; Nies, L. F.; Turco, R. F.; Bickham, J. W.; Sepulveda, M. S. *Ecotoxicology.* **2010**, *19*, 185-195.
38. Roh, J.-y.; Sim, S. J.; Yi, J.; Park, K.; Chung, K. H.; Ryu, D.-y.; Choi, J. *Environ Sci Technol.* **2009**, *43*, 3933-3940.
39. Mortimer, M.; Kasemets, K.; Vodovnik, M.; Marinsek-Logar, R.; Kahru, A. *Environ Sci Technol.* **2011**, *45*, 6617-6624.
40. Pang, C.; Selck, H.; Banta, G. T.; Misra, S. K.; Berhanu, D.; Dybowska, A.; Valsami-Jones, E.; Forbes, V. E. *Environ Toxicol Chem.* **2013**, *32*, 1561-1573.
41. Santo, N.; Fascio, U.; Torres, F.; Guazzoni, N.; Tremolada, P.; Bettinetti, R.; Mantecca, P.; Bacchetta, R. *Water Res.* **2014**, *53*, 339-350.
42. Yu, L.-p.; Fang, T.; Xiong, D.-w.; Zhu, W.-t.; Sima, X.-f. *J Environ Monit.* **2011**, *13*, 1975-1982.
43. Gou, N.; Gu, A. Z. *Environ Sci Technol.* **2011**, *45*, 5410-5417.
44. Fabrega, J.; Renshaw, J. C.; Lead, J. R. *Environ Sci Technol.* **2009**, *43*, 9004-9009.
45. Hu, C.; Li, M.; Wang, W.; Cui, Y.; Chen, J.; Yang, L. *Toxicol Environ Chem.* **2012**, *94*, 732-741.
46. Manier, N.; Bado-Nilles, A.; Delalain, P.; Aguerre-Chariol, O.; Pandard, P. *Environ Pollut.* **2013**, *180*, 63-70.
47. Rodea-Palomares, I.; Boltes, K.; Fernandez-Pinas, F.; Leganes, F.; Garcia-Calvo, E.; Santiago, J.; Rosal, R. *Toxicol Sci.* **2011**, *119*, 135-145.
48. Long, Z.; Ji, J.; Yang, K.; Lin, D.; Wu, F. *Environ Sci Technol.* **2012**, *46*, 8458-8466.
49. Liu, S.; Wei, L.; Hao, L.; Fang, N.; Chang, M. W.; Xu, R.; Yang, Y.; Chen, Y. *ACS Nano.* **2009**, *3*, 3891-3902.
50. Templeton, R. C.; Ferguson, P. L.; Washburn, K. M.; Scrivens, W. A.; Chandler, G. T. *Environ Sci Technol.* **2006**, *40*, 7387-7393.
51. Simon-Deckers, A.; Loo, S.; Mayne-L'Hermite, M.; Herlin-Boime, N.; Menguy, N.; Reynaud, C.; Gouget, B.; Carriere, M. *Environ Sci Technol.* **2009**, *43*, 8423-8429.
52. Xiong, D.; Fang, T.; Yu, L.; Sima, X.; Zhu, W. *Sci Total Environ.* **2011**, *409*, 1444-1452.
53. Lee, W.-M.; An, Y.-J. *Chemosphere.* **2013**, *91*, 536-544.
54. Dasari, T. P.; Hwang, H.-M. *Sci Total Environ.* **2010**, *408*, 5817-5823.
55. Nair, P. M. G.; Park, S. Y.; Choi, J. *Chemosphere.* **2013**, *92*, 592-599.
56. Zhang, H.; He, X.; Zhang, Z.; Zhang, P.; Li, Y.; Ma, Y.; Kuang, Y.; Zhao, Y.; Chai, Z. *Environ Sci Technol.* **2011**, *45*, 3725-3730.
57. Pereira, M. M.; Mouton, L.; Yepremian, C.; Coute, A.; Lo, J.; Marconcini, J. M.; Ladeira, L. O.; Raposo, N. R. B.; Brandao, H. M.; Brayner, R. *J Nanobiotechnology.* **2014**, *12*.
58. Klaper, R.; Crago, J.; Barr, J.; Arndt, D.; Setyowati, K.; Chen, J. *Environ Pollut.* **2009**, *157*, 1152-1156.
59. Hao, L.; Wang, Z.; Xing, B. *J Environ Sci-China.* **2009**, *21*, 1459-1466.
60. Kumar, A.; Pandey, A. K.; Singh, S. S.; Shanker, R.; Dhawan, A. *Free Radical Biol Med.* **2011**, *51*, 1872-1881.
61. Hu, C. W.; Li, M.; Cui, Y. B.; Li, D. S.; Chen, J.; Yang, L. Y. *Soil Biol Biochem.* **2010**, *42*, 586-591.
62. Hao, L.; Chen, L. *Ecotoxicol Environ Saf.* **2012**, *80*, 103-110.

63. Fahmy, S. R.; Abdel-Ghaffar, F.; Bakry, F. A.; Sayed, D. A. *Arch Environ Contam Toxicol.* **2014**, *67*, 192-202.
64. Park, S.-y.; Choi, J. *Environ Eng Res.* **2010**, *15*, 23-27.
65. Nair, P. M. G.; Park, S. Y.; Lee, S.-W.; Choi, J. *Aquat Toxicol.* **2011**, *101*, 31-37.
66. Ghosh, M.; Manivannan, J.; Sinha, S.; Chakraborty, A.; Mallick, S. K.; Bandyopadhyay, M.; Mukherjee, A. *Mutat Res-Genet Toxicol Environ Mutag.* **2012**, *749*, 60-69.
67. Schwab, F.; Bucheli, T. D.; Lukhele, L. P.; Magrez, A.; Nowack, B.; Sigg, L.; Knauer, K. *Environ Sci Technol.* **2011**, *45*, 6136-6144.
68. Gaiser, B. K.; Biswas, A.; Rosenkranz, P.; Jepson, M. A.; Lead, J. R.; Stone, V.; Tyler, C. R.; Fernandes, T. F. *J Environ Monit.* **2011**, *13*, 1227-1235.
69. Artells, E.; Issartel, J.; Auffan, M.; Borschneck, D.; Thill, A.; Tella, M.; Brousset, L.; Rose, J.; Bottero, J.-Y.; Thiery, A. *PLoS One.* **2013**, *8*.
70. Dabrunz, A.; Duester, L.; Prasse, C.; Seitz, F.; Rosenfeldt, R.; Schilde, C.; Schaumann, G. E.; Schulz, R. *PLoS One.* **2011**, *6*.
71. Farkas, J.; Christian, P.; Urrea, J. A. G.; Roos, N.; Hasselov, M.; Tollefsen, K. E.; Thomas, K. V. *Aquat Toxicol.* **2010**, *96*, 44-52.
72. Fabrega, J.; Zhang, R.; Renshaw, J. C.; Liu, W.-T.; Lead, J. R. *Chemosphere.* **2011**, *85*, 961-966.
73. Resano, M.; Lapena, A. C.; Belarra, M. A. *Anal Methods.* **2013**, *5*, 1130-1139.
74. Musante, C.; White, J. C. *Environ Toxicol.* **2012**, *27*, 510-517.
75. Bourdiol, F.; Mouchet, F.; Perrault, A.; Fourquaux, I.; Datas, L.; Gancet, C.; Boutonnet, J.-C.; Pinelli, E.; Gauthier, L.; Flahaut, E. *Carbon.* **2013**, *54*, 175-191.
76. Hanna, S. K.; Miller, R. J.; Lenihan, H. S. *J Hazard Mater.* **2014**, *279*, 32-37.
77. Petersen, E. J.; Akkanen, J.; Kukkonen, J. V. K.; Weber, W. J., Jr. *Environ Sci Technol.* **2009**, *43*, 2969-2975.
78. Petersen, E. J.; Pinto, R. A.; Mai, D. J.; Landrum, P. F.; Weber, W. J., Jr. *Environ Sci Technol.* **2011**, *45*, 1133-1138.
79. Dai, L.; Syberg, K.; Banta, G. T.; Selck, H.; Forbes, V. E. *ACS Sustain Chem Eng.* **2013**, *1*, 760-767.
80. Hu, J.; Wang, D.; Wang, J.; Wang, J. *Environ Pollut.* **2012**, *162*, 216-222.
81. Chen, P.-J.; Tan, S.-W.; Wu, W.-L. *Environ Sci Technol.* **2012**, *46*, 8431-8439.
82. Pakarinen, K.; Petersen, E. J.; Leppanen, M. T.; Akkanen, J.; Kukkonen, J. V. K. *Environ Pollut.* **2011**, *159*, 3750-3756.
83. Pakarinen, K.; Petersen, E. J.; Alvila, L.; Waissi-Leinonen, G. C.; Akkanen, J.; Leppanen, M. T.; Kukkonen, J. V. K. *Environ Toxicol Chem.* **2013**, *32*, 1224-1232.
84. Zhu, X.; Zhu, L.; Chen, Y.; Tian, S. *J Nanopart Res.* **2009**, *11*, 67-75.
85. Jovanovic, B.; Guzman, H. M. *Environ Toxicol Chem.* **2014**, *33*, 1346-1353.
86. Zhu, X.; Chang, Y.; Chen, Y. *Chemosphere.* **2010**, *78*, 209-215.
87. Sun, H.; Zhang, X.; Niu, Q.; Chen, Y.; Crittenden, J. C. *Water Air Soil Poll.* **2007**, *178*, 245-254.
88. Zhang, X.; Sun, H.; Zhang, Z.; Niu, Q.; Chen, Y.; Crittenden, J. C. *Chemosphere.* **2007**, *67*, 160-166.
89. Sun, H.; Zhang, X.; Zhang, Z.; Chen, Y.; Crittenden, J. C. *Environ Pollut.* **2009**, *157*, 1165-1170.
90. Zhu, X.; Wang, J.; Zhang, X.; Chang, Y.; Chen, Y. *Chemosphere.* **2010**, *79*, 928-933.
91. Larue, C.; Castillo-Michel, H.; Sobanska, S.; Trcera, N.; Sorieul, S.; Cecillon, L.; Ouerdane, L.; Legros, S.; Sarret, G. *J Hazard Mater.* **2014**, *273*, 17-26.
92. Larue, C.; Laurette, J.; Herlin-Boime, N.; Khodja, H.; Fayard, B.; Flank, A.-M.; Brisset, F.; Carriere, M. *Sci Total Environ.* **2012**, *431*, 197-208.
93. Asghari, S.; Johari, S. A.; Lee, J. H.; Kim, Y. S.; Jeon, Y. B.; Choi, H. J.; Moon, M. C.; Yu, I. J. *J Nanobiotechnology.* **2012**, *10*.

94. Schwabe, F.; Schulin, R.; Limbach, L. K.; Stark, W.; Buerge, D.; Nowack, B. *Chemosphere*. **2013**, *91*, 512-520.
95. Mwangi, J. N.; Wang, N.; Ingersoll, C. G.; Hardesty, D. K.; Brunson, E. L.; Li, H.; Deng, B. *Environ Toxicol Chem*. **2012**, *31*, 1823-1830.
96. Martinez, D. S. T.; Faria, A. F.; Berni, E.; Souza Filho, A. G.; Almeida, G.; Caloto-Oliveira, A.; Grossman, M. J.; Durrant, L. R.; Umbuzeiro, G. A.; Alves, O. L. *Process Biochem*. **2014**, *49*, 1162-1168.
97. Roberts, A. P.; Mount, A. S.; Seda, B.; Souther, J.; Qiao, R.; Lin, S.; Ke, P. C.; Rao, A. M.; Klaine, S. J. *Environ Sci Technol*. **2007**, *41*, 3025-3029.
98. Lin, S.; Reppert, J.; Hu, Q.; Hudson, J. S.; Reid, M. L.; Ratnikova, T. A.; Rao, A. M.; Luo, H.; Ke, P. C. *Small*. **2009**, *5*, 1128-1132.
99. Planchon, M.; Ferrari, R.; Guyot, F.; Gelabert, A.; Menguy, N.; Chaneac, C.; Thill, A.; Benedetti, M. F.; Spalla, O. *Colloids Surf B Biointerfaces*. **2013**, *102*, 158-164.
100. Li, L.; Sillanpaa, M.; Tuominen, M.; Lounatmaa, K.; Schultz, E. *Ecotoxicol Environ Saf*. **2013**, *88*, 89-94.
101. Jarvis, T. A.; Miller, R. J.; Lenihan, H. S.; Bielmyer, G. K. *Environ Toxicol Chem*. **2013**, *32*, 1264-1269.
102. Lin, D.; Xing, B. *Environ Sci Technol*. **2008**, *42*, 5580-5585.
103. Mouchet, F.; Landois, P.; Puech, P.; Pinelli, E.; Flahaut, E.; Gauthier, L. *Nanomedicine*. **2010**, *5*, 963-974.
104. Kennedy, A. J.; Gunter, J. C.; Chappell, M. A.; Goss, J. D.; Hull, M. S.; Kirgan, R. A.; Steevens, J. A. *Environ Toxicol Chem*. **2009**, *28*, 1930-1938.
105. Kowk, K. W. H.; Leung, K. M. Y.; Flahaut, E.; Cheng, J.; Cheng, S. H. *Nanomedicine*. **2010**, *5*, 951-961.
106. Chan, T. S. Y.; Nasser, F.; St-Denis, C. H.; Mandal, H. S.; Ghafari, P.; Hadjout-Rabi, N.; Bols, N. C.; Tang, X. *Nanotoxicology*. **2013**, *7*, 251-258.
107. Strigul, N.; Vaccari, L.; Galdun, C.; Wazne, M.; Liu, X.; Christodoulatos, C.; Jasinkiewicz, K. *Desalination*. **2009**, *248*, 771-782.
108. Kim, K. T.; Klaine, S. J.; Cho, J.; Kim, S.-H.; Kim, S. D. *Sci Total Environ*. **2010**, *408*, 2268-2272.
109. Galloway, T.; Lewis, C.; Dolciotti, I.; Johnston, B. D.; Moger, J.; Regoli, F. *Environ Pollut*. **2010**, *158*, 1748-1755.
110. Kumar, A.; Pandey, A. K.; Singh, S. S.; Shanker, R.; Dhawan, A. *Cytometry Part A*. **2011**, *79A*, 707-712.
111. Dalai, S.; Pakrashi, S.; Chandrasekaran, N.; Mukherjee, A. *PLoS One*. **2013**, *8*.
